# Supplementary material for: Spinal V1 inhibitory interneuron clades differ in birthdate, projections to motoneurons, and heterogeneity
Source: eLife journal article supplement (doi:10.7554/elife.95172), 2024-05-01

*Foxp2*(+/+)

*Foxp2*(-/-)

*Foxp2*(+/-)

*Foxp2*(Gt)

Loading  
Control

kDa

250

150

100

75

50

37

20

10

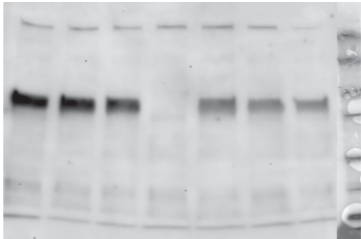

Supplement: fig1-figsupp1-data2 [file elife-95172-fig1-figsupp1-data2-v1.pdf]
