# Supplementary material for: Spinal V1 inhibitory interneuron clades differ in birthdate, projections to motoneurons, and heterogeneity
Source: eLife journal article supplement (doi:10.7554/elife.95172), 2024-05-01

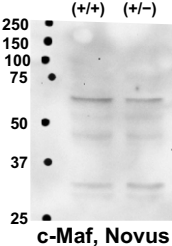

Supplement: fig1-figsupp2-data3 [file elife-95172-fig1-figsupp2-data3-v1.pdf]
