# Supplementary material for: Spinal V1 inhibitory interneuron clades differ in birthdate, projections to motoneurons, and heterogeneity
Source: eLife journal article supplement (doi:10.7554/elife.95172), 2024-05-01
Supplement: fig7-figsupp1-data1 [file elife-95172-fig7-figsupp1-data1-v1.pdf]

2/22/10 24K screen  
w/ 1 extension  
screen

Otp-FloobpA cut w/ BamHI  
5' probe; 0.85% gel

wt = 5.2

knock allele = 8.2

M 1 2 3 4 5 6 7 8 9 10 11 12 13 14 15 16 17 18 19 20 21 22 23 24 25 26 27 28 29 30 31 32 33 34 M

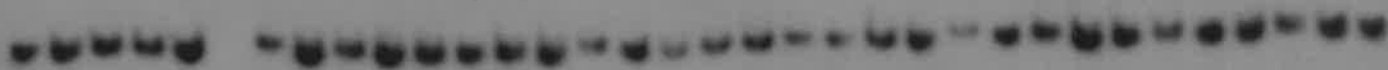

M 35 36 37 38 39 40 41 42 43 44 45 46 47 48 49 50 51 52 53 54 55 56 57 58 59 60 61 62 63 64 65 66 67 68 M

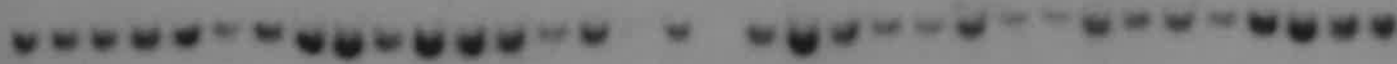

M 69 70 71 72 73 74 75 76 77 78 79 80 81 82 83 84 85 86 87 88 89 90 91 92 93 94 95 96 M

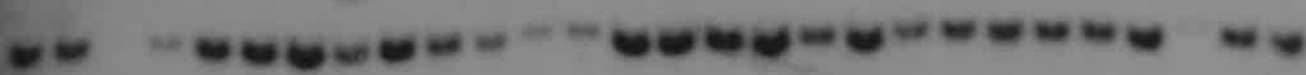

Close  
on large  
screen
