# Supplementary material for: Spinal V1 inhibitory interneuron clades differ in birthdate, projections to motoneurons, and heterogeneity
Source: eLife journal article supplement (doi:10.7554/elife.95172), 2024-05-01
Supplement: fig7-figsupp1-data2 [file elife-95172-fig7-figsupp1-data2-v1.pdf]

Otp::Flpo

---

Wt    KI    Wt

10 —

5 —

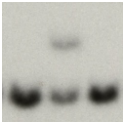

BamH1 Digest;  
5' Probe
